# Supplementary material for: Solar light driven Rhodamine B degradation over highly active β-SiC–TiO2nanocomposite
Source: Royal Society of Chemistry journal article supplement (doi:10.1039/c3ra46578k), 2014-01-01
Supplement: c3ra46578k1.pdf [file c3ra46578k1.pdf]

**Supporting information**

**Solar light driven Rhodamine B degradation over highly active  $\beta$ -SiC—TiO<sub>2</sub> nanocomposite**

**Gopa Mishra,<sup>a, b</sup> K. M. Parida,<sup>\*a, b</sup> and S. K. Singh<sup>a, c</sup>**

<sup>a</sup>Academy of Scientific and Innovative Research (AcSIR), Council of Scientific and Industrial Research, Anusandhan Bhawan, 2 Rafi Marg, New Delhi-110 001, India

<sup>b</sup>Colloids & Materials Chemistry Department, CSIR-Institute of Minerals and Materials Technology, Bhubaneswar, 751013, Odisha, India

<sup>c</sup>Advanced Materials Technology Department, CSIR-Institute of Minerals and Materials Technology, Bhubaneswar, 751013, Odisha, India

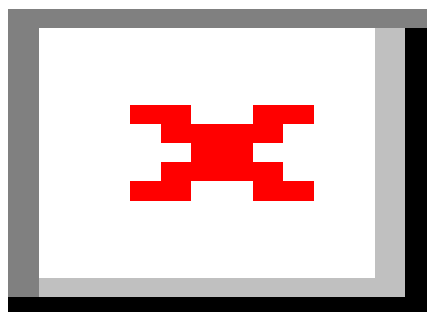

**Fig. S1**

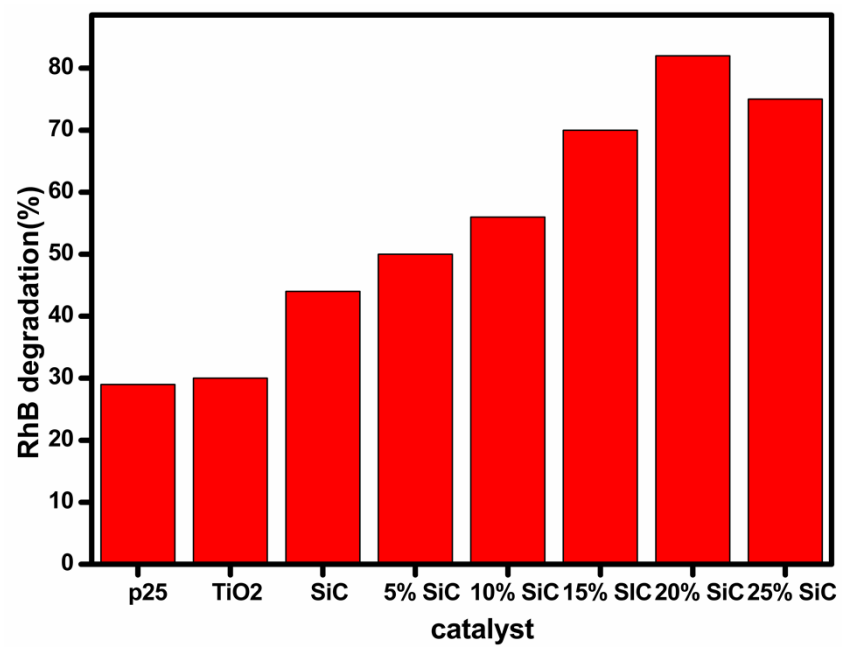

Fig. S2

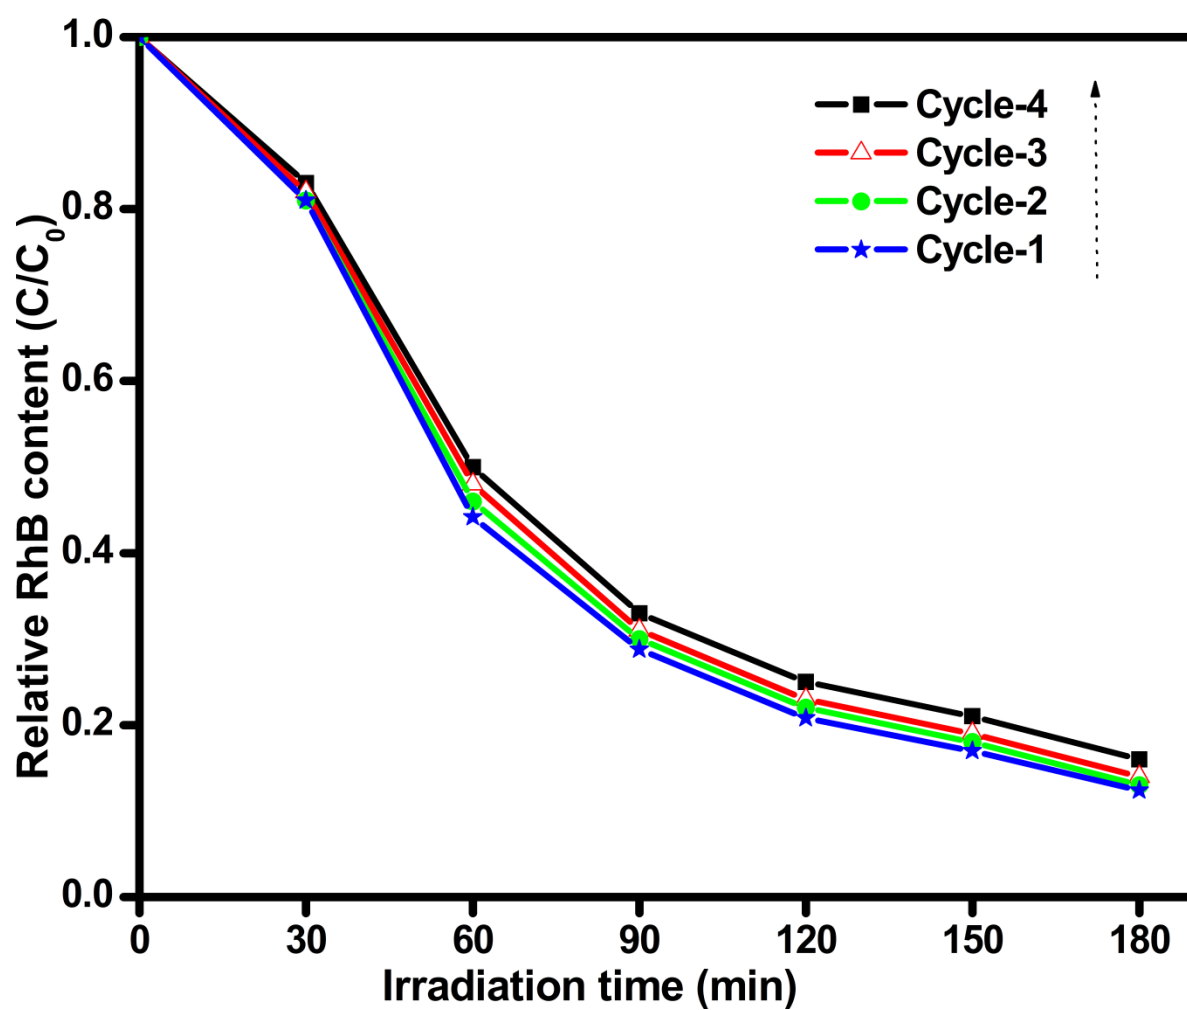

Fig. S3 Recyclability performance of 20 wt%  $\beta$ -SiC—TiO<sub>2</sub> nanocomposite
